# Supplementary material
Source: Springer Nature journal article supplement (https://www.springermedizin.de/resource/supplementary/13099_2010_39_MOESM2_ESM.pdf/9665382)

|                | <b>Study name</b> | <b>Country</b>      | <b>Odds ratio</b> | <b>Lower limit</b> | <b>Upper limit</b> | <b>Weight</b> |
|----------------|-------------------|---------------------|-------------------|--------------------|--------------------|---------------|
|                | <b>Lu</b>         | <b>Japan</b>        | <b>0.68</b>       | <b>0.16</b>        | <b>2.87</b>        | <b>1.86</b>   |
|                | <b>Lu</b>         | <b>Korea</b>        | <b>0.89</b>       | <b>0.14</b>        | <b>5.68</b>        | <b>1.12</b>   |
|                | <b>Argent</b>     | <b>China</b>        | <b>8.14</b>       | <b>0.26</b>        | <b>250.73</b>      | <b>0.33</b>   |
|                | <b>Douraghi</b>   | <b>Iran</b>         | <b>1.25</b>       | <b>0.56</b>        | <b>2.81</b>        | <b>5.84</b>   |
|                | <b>Schmidt</b>    | <b>China</b>        | <b>2.96</b>       | <b>1.06</b>        | <b>8.30</b>        | <b>3.61</b>   |
|                | <b>Zhang</b>      | <b>China</b>        | <b>0.51</b>       | <b>0.27</b>        | <b>0.95</b>        | <b>9.89</b>   |
|                | <b>Nguyen</b>     | <b>Japan</b>        | <b>1.00</b>       | <b>0.41</b>        | <b>2.41</b>        | <b>4.92</b>   |
| <b>Asia</b>    |                   |                     | <b>0.94</b>       | <b>0.65</b>        | <b>1.37</b>        |               |
|                | <b>Lu</b>         | <b>Colombia</b>     | <b>0.23</b>       | <b>0.08</b>        | <b>0.66</b>        | <b>3.38</b>   |
|                | <b>Argent</b>     | <b>Belgium</b>      | <b>1.80</b>       | <b>0.65</b>        | <b>4.96</b>        | <b>3.75</b>   |
|                | <b>Gomes</b>      | <b>Brazil</b>       | <b>0.59</b>       | <b>0.24</b>        | <b>1.45</b>        | <b>4.71</b>   |
|                | <b>Schmidt</b>    | <b>Sweden</b>       | <b>0.88</b>       | <b>0.25</b>        | <b>3.12</b>        | <b>2.37</b>   |
| <b>Western</b> |                   |                     | <b>1.09</b>       | <b>0.74</b>        | <b>1.63</b>        |               |
|                | <b>Argent</b>     | <b>South Africa</b> | <b>2.91</b>       | <b>0.45</b>        | <b>18.74</b>       | <b>1.11</b>   |
| <b>Overall</b> |                   |                     | <b>0.87</b>       | <b>0.64</b>        | <b>1.17</b>        |               |

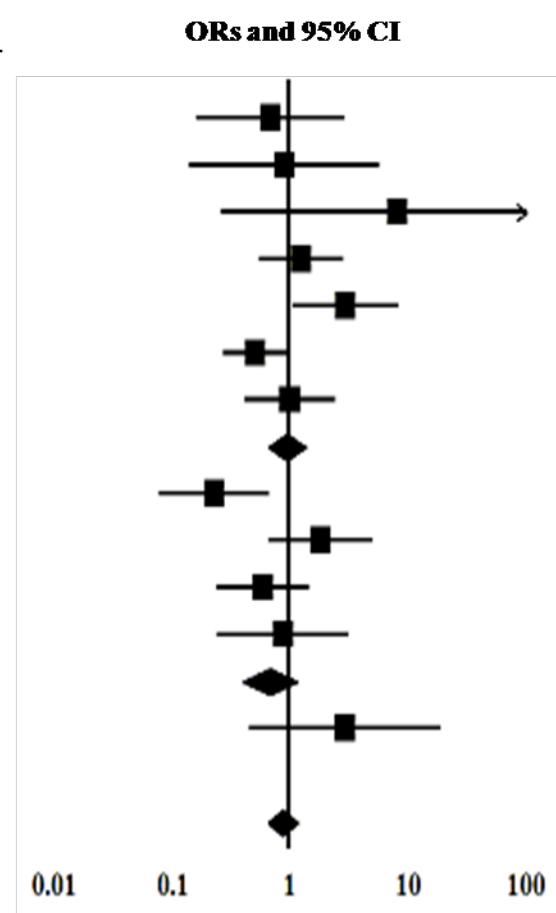

Supplement: MOESM2 [file 9665382]
